# Supplementary material for: Epidemiology of Inflammatory Bowel Disease in a Cohort of US Black Women
Source: bioRxiv or medRxiv preprint supplement (doi:10.1101/2022.07.14.22277547), 2022-07-17
Supplement: Supplementary file [file media-1.pdf]

# Crohn's IBD Questionnaire

1. Please write in your age and date of birth.

|  |  |
|--|--|
|  |  |
|--|--|

Age

|  |  |
|--|--|
|  |  |
|--|--|

Month

|  |  |
|--|--|
|  |  |
|--|--|

Day

|   |   |  |  |
|---|---|--|--|
| 1 | 9 |  |  |
|---|---|--|--|

Year

(example: June = 06)

2. Which of the following have you ever been diagnosed with (check all that apply):

Age at diagnosis

- |                                                  |                                                                                          |  |  |
|--------------------------------------------------|------------------------------------------------------------------------------------------|--|--|
| <input type="radio"/> Ulcerative Colitis         | <table border="1" style="width: 30px; height: 20px;"><tr><td></td><td></td></tr></table> |  |  |
|                                                  |                                                                                          |  |  |
| <input type="radio"/> Crohn's disease            | <table border="1" style="width: 30px; height: 20px;"><tr><td></td><td></td></tr></table> |  |  |
|                                                  |                                                                                          |  |  |
| <input type="radio"/> Inflammatory Bowel Disease | <table border="1" style="width: 30px; height: 20px;"><tr><td></td><td></td></tr></table> |  |  |
|                                                  |                                                                                          |  |  |
| <input type="radio"/> Microscopic Colitis        | <table border="1" style="width: 30px; height: 20px;"><tr><td></td><td></td></tr></table> |  |  |
|                                                  |                                                                                          |  |  |
| <input type="radio"/> Irritable Bowel Syndrome   | <table border="1" style="width: 30px; height: 20px;"><tr><td></td><td></td></tr></table> |  |  |
|                                                  |                                                                                          |  |  |

3. **Including your first episode**, have you experienced any of the following symptoms related to your ulcerative colitis, Crohn's disease, inflammatory bowel disease, or Microscopic Colitis (Collagenous or Lymphocytic)? Please indicate the longest duration of each symptom. (Check all that apply).

| Symptom                                                                  | Duration of symptoms  |                       |                       |
|--------------------------------------------------------------------------|-----------------------|-----------------------|-----------------------|
|                                                                          | Less than 2 weeks     | 2 to 3 weeks          | 4 weeks or greater    |
| Abdominal pain                                                           | <input type="radio"/> | <input type="radio"/> | <input type="radio"/> |
| Diarrhea                                                                 | <input type="radio"/> | <input type="radio"/> | <input type="radio"/> |
| Rectal bleeding/ blood in stool (not due to hemorrhoids or constipation) | <input type="radio"/> | <input type="radio"/> | <input type="radio"/> |
| Fever greater than 100.5°F                                               | <input type="radio"/> | <input type="radio"/> | <input type="radio"/> |
| Fatigue or lack of energy                                                | <input type="radio"/> | <input type="radio"/> | <input type="radio"/> |
| Difficulty sleeping                                                      | <input type="radio"/> | <input type="radio"/> | <input type="radio"/> |
| Nausea                                                                   | <input type="radio"/> | <input type="radio"/> | <input type="radio"/> |
| Vomiting                                                                 | <input type="radio"/> | <input type="radio"/> | <input type="radio"/> |
| Mouth sores                                                              | <input type="radio"/> | <input type="radio"/> | <input type="radio"/> |
| Back pain                                                                | <input type="radio"/> | <input type="radio"/> | <input type="radio"/> |
| Night sweats                                                             | <input type="radio"/> | <input type="radio"/> | <input type="radio"/> |
| Decreased appetite                                                       | <input type="radio"/> | <input type="radio"/> | <input type="radio"/> |
| Weight loss                                                              | <input type="radio"/> | <input type="radio"/> | <input type="radio"/> |

4. Which of the following profiles most accurately reflects the course of your disease?

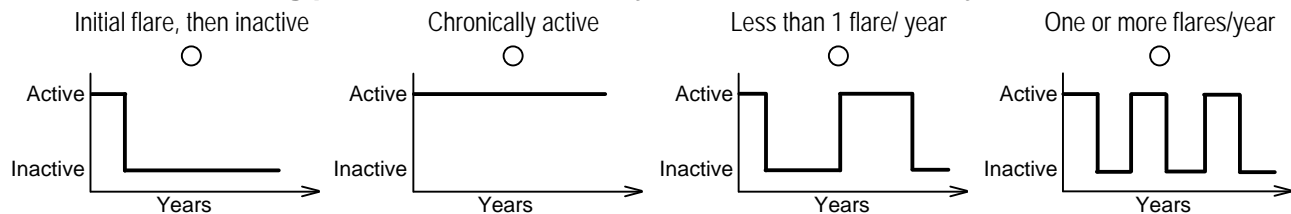

5. IN THE PAST SIX MONTHS, my disease has been:

- Constantly active, giving me symptoms every day
- Often active, giving me symptoms most days
- Sometimes active, giving me symptoms some days (for instance, 1 - 2 days per week)
- Occasionally active, giving me symptoms 1 - 2 days per month
- Rarely active, giving me symptoms on a few days the past 6 months
- I was well in the past 6 months, what I consider a remission or absence of symptoms

*Next page, please.* →

**6. Since your initial diagnosis, how many times have you been hospitalized for colitis or Crohn's disease?**

|  |  |
|--|--|
|  |  |
|--|--|

|    | Name of hospital | month | year |
|----|------------------|-------|------|
| 1) |                  |       |      |
| 2) |                  |       |      |
| 3) |                  |       |      |

***For those with a Microscopic Colitis Diagnosis Only, please skip to question 10.*** →

**7. Have you ever had any of the following complications or surgeries? (Check all that apply).**

|                                                                          | Date first diagnosed<br>month | year |                                                                  | Date first diagnosed<br>month | year |
|--------------------------------------------------------------------------|-------------------------------|------|------------------------------------------------------------------|-------------------------------|------|
| <input type="checkbox"/> Perianal or perirectal fistula                  |                               |      | <input type="checkbox"/> Resection or removal of small intestine |                               |      |
| <input type="checkbox"/> Fistula between intestine and vagina or bladder |                               |      | <input type="checkbox"/> Partial colectomy                       |                               |      |
| <input type="checkbox"/> Fistula between intestine and skin (draining)   |                               |      | <input type="checkbox"/> Total colectomy                         |                               |      |
| <input type="checkbox"/> Fistula between intestines                      |                               |      | <input type="checkbox"/> Ileostomy                               |                               |      |
| <input type="checkbox"/> Stricture (narrowing) of the intestine or colon |                               |      | <input type="checkbox"/> Ileal or J-pouch                        |                               |      |
| <input type="checkbox"/> Bowel obstruction                               |                               |      | <input type="checkbox"/> Appendectomy                            |                               |      |
| <input type="checkbox"/> Abscess (collection of pus) in the abdomen      |                               |      | <input type="checkbox"/> Gallbladder surgery                     |                               |      |

**8. How many surgeries (NOT including endoscopies) have you had for ulcerative colitis or Crohn's disease?**

|  |  |
|--|--|
|  |  |
|--|--|

|    | Type of surgery | Name of hospital | month | year |
|----|-----------------|------------------|-------|------|
| 1) |                 |                  |       |      |
| 2) |                 |                  |       |      |
| 3) |                 |                  |       |      |

**9. Has a physician ever diagnosed any of the following conditions in you? (Check all that apply).**

|                                                                                       | Date first diagnosed<br>month | year |
|---------------------------------------------------------------------------------------|-------------------------------|------|
| <input type="checkbox"/> Uveitis (eye inflammation)                                   |                               |      |
| <input type="checkbox"/> Iritis (eye inflammation)                                    |                               |      |
| <input type="checkbox"/> Pyoderma gangrenosum (ulcerating skin disease)               |                               |      |
| <input type="checkbox"/> Erythema nodosum (painful red bumps)                         |                               |      |
| <input type="checkbox"/> Colon cancer                                                 |                               |      |
| <input type="checkbox"/> Precancerous lesions in the colon (e.g. polyps or dysplasia) |                               |      |
| <input type="checkbox"/> Pouchitis (inflammation in ileal or J-pouch)                 |                               |      |
| <input type="checkbox"/> Arthritis or joint swelling due to colitis/Crohn's           |                               |      |
| <input type="checkbox"/> Ankylosing spondylitis                                       |                               |      |
| <input type="checkbox"/> Primary sclerosing cholangitis                               |                               |      |
| <input type="checkbox"/> Blood clot, venous thrombosis or embolism                    |                               |      |
| <input type="checkbox"/> Kidney stones                                                |                               |      |

*Next page, please.* →

**10. For your ulcerative colitis, Crohn's disease, inflammatory bowel disease or Microscopic Colitis (Collagenous or Lymphocytic), what treatments have you received or have you been receiving and how did the following medications make you feel? (Check all that apply).**

**Instructions:**

**Full recovery:** medication made me feel completely better

**Partial recovery:** medication made me feel a little (partially) better

**No recovery:** medication did not make me feel any better

**Felt worse:** had to stop taking because of side-effects

| Medication                                                                           | Taken                 |                       | Date started          |                      | Date stopped         |                      | What was your response to the medication? |                       |                       |                       |
|--------------------------------------------------------------------------------------|-----------------------|-----------------------|-----------------------|----------------------|----------------------|----------------------|-------------------------------------------|-----------------------|-----------------------|-----------------------|
|                                                                                      | At first episode      | Ever                  | month                 | year                 | month                | year                 | Full recovery                             | Partial recovery      | No recovery           | Felt worse            |
|                                                                                      | Oral sulfasalazine    | <input type="radio"/> | <input type="radio"/> | <input type="text"/> | <input type="text"/> | <input type="text"/> | <input type="text"/>                      | <input type="radio"/> | <input type="radio"/> | <input type="radio"/> |
| Oral mesalamine (e.g., Dipentum, Asacol, Pentasa, Colazal, Lialda, Apriso, Delzicol) | <input type="radio"/> | <input type="radio"/> | <input type="text"/>  | <input type="text"/> | <input type="text"/> | <input type="text"/> | <input type="radio"/>                     | <input type="radio"/> | <input type="radio"/> | <input type="radio"/> |
| Intravenous steroids (e.g., solumedrol, hydrocortisone)                              | <input type="radio"/> | <input type="radio"/> | <input type="text"/>  | <input type="text"/> | <input type="text"/> | <input type="text"/> | <input type="radio"/>                     | <input type="radio"/> | <input type="radio"/> | <input type="radio"/> |
| Oral prednisone                                                                      | <input type="radio"/> | <input type="radio"/> | <input type="text"/>  | <input type="text"/> | <input type="text"/> | <input type="text"/> | <input type="radio"/>                     | <input type="radio"/> | <input type="radio"/> | <input type="radio"/> |
| Oral budesonide (e.g., Entocort) or Budesonide MMX (e.g. Uceris)                     | <input type="radio"/> | <input type="radio"/> | <input type="text"/>  | <input type="text"/> | <input type="text"/> | <input type="text"/> | <input type="radio"/>                     | <input type="radio"/> | <input type="radio"/> | <input type="radio"/> |
| Mesalamine suppository or enema (e.g., Canasa, Rowasa)                               | <input type="radio"/> | <input type="radio"/> | <input type="text"/>  | <input type="text"/> | <input type="text"/> | <input type="text"/> | <input type="radio"/>                     | <input type="radio"/> | <input type="radio"/> | <input type="radio"/> |
| Steroid suppository or enema                                                         | <input type="radio"/> | <input type="radio"/> | <input type="text"/>  | <input type="text"/> | <input type="text"/> | <input type="text"/> | <input type="radio"/>                     | <input type="radio"/> | <input type="radio"/> | <input type="radio"/> |
| Antibiotics                                                                          | <input type="radio"/> | <input type="radio"/> | <input type="text"/>  | <input type="text"/> | <input type="text"/> | <input type="text"/> | <input type="radio"/>                     | <input type="radio"/> | <input type="radio"/> | <input type="radio"/> |
| Cyclosporine                                                                         | <input type="radio"/> | <input type="radio"/> | <input type="text"/>  | <input type="text"/> | <input type="text"/> | <input type="text"/> | <input type="radio"/>                     | <input type="radio"/> | <input type="radio"/> | <input type="radio"/> |
| 6-mercaptopurine (6MP) or azathioprine (Imuran)                                      | <input type="radio"/> | <input type="radio"/> | <input type="text"/>  | <input type="text"/> | <input type="text"/> | <input type="text"/> | <input type="radio"/>                     | <input type="radio"/> | <input type="radio"/> | <input type="radio"/> |
| Methotrexate                                                                         | <input type="radio"/> | <input type="radio"/> | <input type="text"/>  | <input type="text"/> | <input type="text"/> | <input type="text"/> | <input type="radio"/>                     | <input type="radio"/> | <input type="radio"/> | <input type="radio"/> |
| Infliximab (Remicade)                                                                | <input type="radio"/> | <input type="radio"/> | <input type="text"/>  | <input type="text"/> | <input type="text"/> | <input type="text"/> | <input type="radio"/>                     | <input type="radio"/> | <input type="radio"/> | <input type="radio"/> |
| Certolizumab (Cimzia)                                                                | <input type="radio"/> | <input type="radio"/> | <input type="text"/>  | <input type="text"/> | <input type="text"/> | <input type="text"/> | <input type="radio"/>                     | <input type="radio"/> | <input type="radio"/> | <input type="radio"/> |
| Adalimumab (Humira)                                                                  | <input type="radio"/> | <input type="radio"/> | <input type="text"/>  | <input type="text"/> | <input type="text"/> | <input type="text"/> | <input type="radio"/>                     | <input type="radio"/> | <input type="radio"/> | <input type="radio"/> |
| Natalizumab (Tysabri)                                                                | <input type="radio"/> | <input type="radio"/> | <input type="text"/>  | <input type="text"/> | <input type="text"/> | <input type="text"/> | <input type="radio"/>                     | <input type="radio"/> | <input type="radio"/> | <input type="radio"/> |
| Vedolizumab (MLN0002)                                                                | <input type="radio"/> | <input type="radio"/> | <input type="text"/>  | <input type="text"/> | <input type="text"/> | <input type="text"/> | <input type="radio"/>                     | <input type="radio"/> | <input type="radio"/> | <input type="radio"/> |
| Golimumab (Simponi)                                                                  | <input type="radio"/> | <input type="radio"/> | <input type="text"/>  | <input type="text"/> | <input type="text"/> | <input type="text"/> | <input type="radio"/>                     | <input type="radio"/> | <input type="radio"/> | <input type="radio"/> |
| Other                                                                                | <input type="radio"/> | <input type="radio"/> | <input type="text"/>  | <input type="text"/> | <input type="text"/> | <input type="text"/> | <input type="radio"/>                     | <input type="radio"/> | <input type="radio"/> | <input type="radio"/> |

→ Please specify

**You may add additional comments here about your use of medications or treatments:**

***For those with a Microscopic Colitis Diagnosis Only, please skip to question 14.*** →

*Next page, please.* →

11. Not counting half siblings, how many siblings do you have? Brothers   Sisters

12. How many biological children do you have? Sons   Daughters

13. Do you have a family history of Crohn's (CD), ulcerative colitis/proctitis (UC) or inflammatory bowel disease (IBD) not otherwise specified (NOS)?

| Relative                            | Type of disease       |                       |                       | Age of first diagnosis |                       |                       |                       |                       |                       |                       |                       |                       | Don't know            |
|-------------------------------------|-----------------------|-----------------------|-----------------------|------------------------|-----------------------|-----------------------|-----------------------|-----------------------|-----------------------|-----------------------|-----------------------|-----------------------|-----------------------|
|                                     | CD                    | US                    | IBD (NOS)             | <20                    | 20-29                 | 30-39                 | 40-49                 | 50-59                 | 60-69                 | 70-79                 | >80                   |                       |                       |
| Mother                              | <input type="radio"/> | <input type="radio"/> | <input type="radio"/> | <input type="radio"/>  | <input type="radio"/> | <input type="radio"/> | <input type="radio"/> | <input type="radio"/> | <input type="radio"/> | <input type="radio"/> | <input type="radio"/> | <input type="radio"/> | <input type="radio"/> |
| Father                              | <input type="radio"/> | <input type="radio"/> | <input type="radio"/> | <input type="radio"/>  | <input type="radio"/> | <input type="radio"/> | <input type="radio"/> | <input type="radio"/> | <input type="radio"/> | <input type="radio"/> | <input type="radio"/> | <input type="radio"/> | <input type="radio"/> |
| <i>Do not include half siblings</i> |                       |                       |                       |                        |                       |                       |                       |                       |                       |                       |                       |                       |                       |
| Brother 1                           | <input type="radio"/> | <input type="radio"/> | <input type="radio"/> | <input type="radio"/>  | <input type="radio"/> | <input type="radio"/> | <input type="radio"/> | <input type="radio"/> | <input type="radio"/> | <input type="radio"/> | <input type="radio"/> | <input type="radio"/> | <input type="radio"/> |
| Brother 2                           | <input type="radio"/> | <input type="radio"/> | <input type="radio"/> | <input type="radio"/>  | <input type="radio"/> | <input type="radio"/> | <input type="radio"/> | <input type="radio"/> | <input type="radio"/> | <input type="radio"/> | <input type="radio"/> | <input type="radio"/> | <input type="radio"/> |
| Sister 1                            | <input type="radio"/> | <input type="radio"/> | <input type="radio"/> | <input type="radio"/>  | <input type="radio"/> | <input type="radio"/> | <input type="radio"/> | <input type="radio"/> | <input type="radio"/> | <input type="radio"/> | <input type="radio"/> | <input type="radio"/> | <input type="radio"/> |
| Sister 2                            | <input type="radio"/> | <input type="radio"/> | <input type="radio"/> | <input type="radio"/>  | <input type="radio"/> | <input type="radio"/> | <input type="radio"/> | <input type="radio"/> | <input type="radio"/> | <input type="radio"/> | <input type="radio"/> | <input type="radio"/> | <input type="radio"/> |
| <i>Biological children only</i>     |                       |                       |                       |                        |                       |                       |                       |                       |                       |                       |                       |                       |                       |
| Son 1                               | <input type="radio"/> | <input type="radio"/> | <input type="radio"/> | <input type="radio"/>  | <input type="radio"/> | <input type="radio"/> | <input type="radio"/> | <input type="radio"/> | <input type="radio"/> | <input type="radio"/> | <input type="radio"/> | <input type="radio"/> | <input type="radio"/> |
| Son 2                               | <input type="radio"/> | <input type="radio"/> | <input type="radio"/> | <input type="radio"/>  | <input type="radio"/> | <input type="radio"/> | <input type="radio"/> | <input type="radio"/> | <input type="radio"/> | <input type="radio"/> | <input type="radio"/> | <input type="radio"/> | <input type="radio"/> |
| Daughter 1                          | <input type="radio"/> | <input type="radio"/> | <input type="radio"/> | <input type="radio"/>  | <input type="radio"/> | <input type="radio"/> | <input type="radio"/> | <input type="radio"/> | <input type="radio"/> | <input type="radio"/> | <input type="radio"/> | <input type="radio"/> | <input type="radio"/> |
| Daughter 2                          | <input type="radio"/> | <input type="radio"/> | <input type="radio"/> | <input type="radio"/>  | <input type="radio"/> | <input type="radio"/> | <input type="radio"/> | <input type="radio"/> | <input type="radio"/> | <input type="radio"/> | <input type="radio"/> | <input type="radio"/> | <input type="radio"/> |
| <i>Additional relatives</i>         |                       |                       |                       |                        |                       |                       |                       |                       |                       |                       |                       |                       |                       |
| <input type="text"/>                | <input type="radio"/> | <input type="radio"/> | <input type="radio"/> | <input type="radio"/>  | <input type="radio"/> | <input type="radio"/> | <input type="radio"/> | <input type="radio"/> | <input type="radio"/> | <input type="radio"/> | <input type="radio"/> | <input type="radio"/> | <input type="radio"/> |
| <input type="text"/>                | <input type="radio"/> | <input type="radio"/> | <input type="radio"/> | <input type="radio"/>  | <input type="radio"/> | <input type="radio"/> | <input type="radio"/> | <input type="radio"/> | <input type="radio"/> | <input type="radio"/> | <input type="radio"/> | <input type="radio"/> | <input type="radio"/> |

14. How would you rate your health today with regard to your ulcerative colitis, Crohn's disease, inflammatory bowel disease, or Microscopic Colitis (Collagenous or Lymphocytic)?

Excellent  Good  Fair  Poor  Very poor

You may add additional comments here :
